# Supplementary material for: P2-type Na2/3Ni1/3Mn2/3−xTixO2 as a new positive electrode for higher energy Na-ion batteries
Source: Royal Society of Chemistry journal article supplement (doi:10.1039/c3cc49856e), 2014-01-01
Supplement: c3cc49856e1.pdf [file c3cc49856e1.pdf]

Supporting Information for

P2-type  $\text{Na}_{2/3}\text{Ni}_{1/3}\text{Mn}_{2/3-x}\text{Ti}_x\text{O}_2$

as a new positive electrode

for higher energy Na-ion batteries

Hiroaki Yoshida,<sup>a</sup> Naoaki Yabuuchi,<sup>a</sup> Kei Kubota,<sup>a</sup> Issei Ikeuchi,<sup>a</sup> Arnd  
Garsuch,<sup>b</sup> Martin Schulz-Dobrick<sup>b</sup> and Shinichi Komaba<sup>a\*</sup>

<sup>a</sup> *Department of Applied Chemistry, Tokyo University of Science,  
1-3 Kagurazaka, Shinjuku, Tokyo 162-8601, Japan*

<sup>b</sup> *BASF SE, GCN/EE - M311, 67056 Ludwigshafen, Germany*

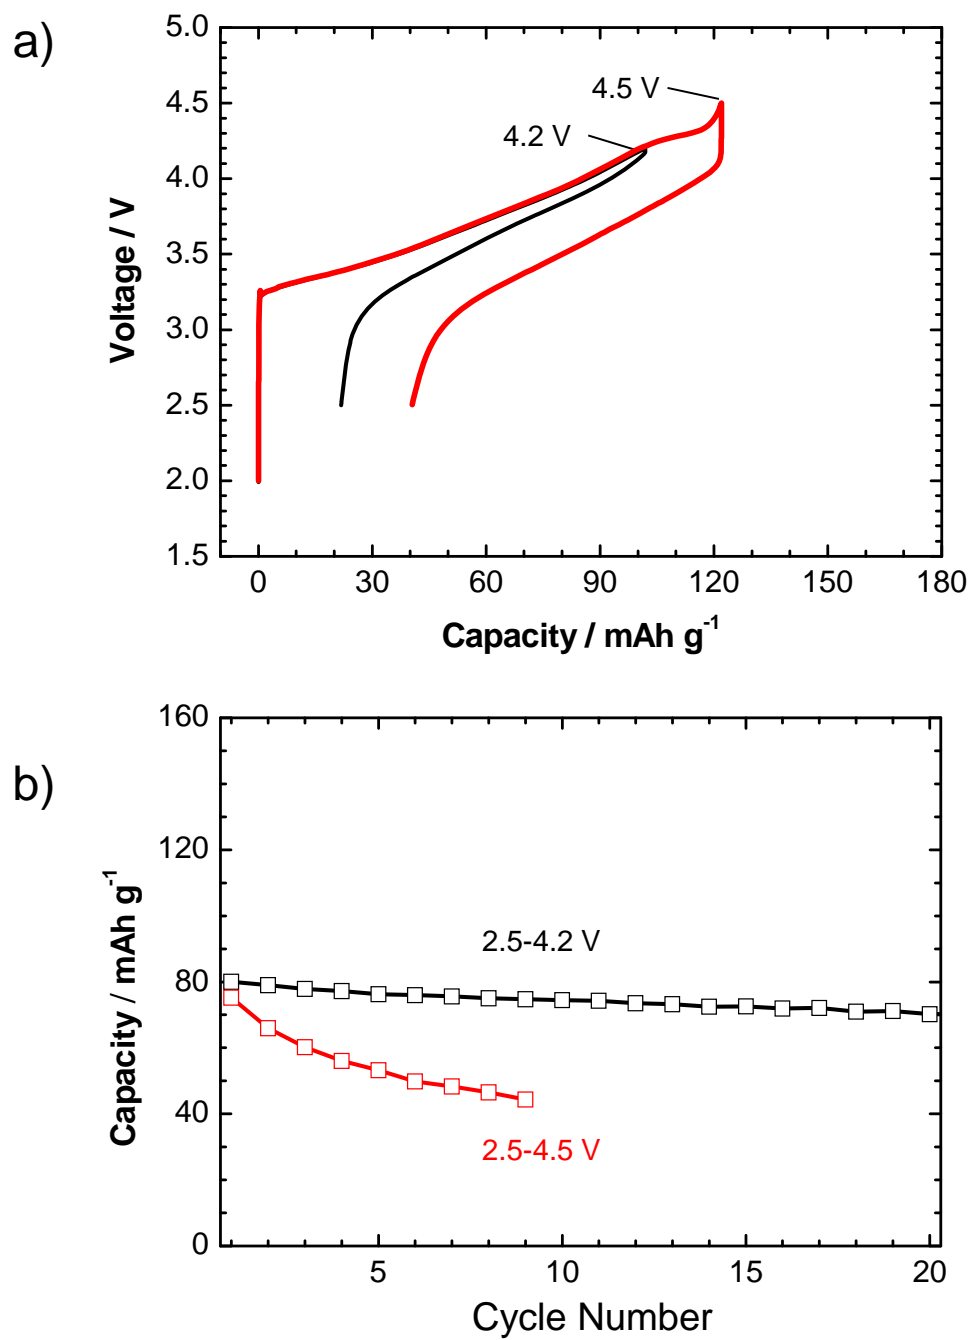

Figure S1. (a) Charge/discharge curves and (b) discharge capacity retention of Na//Na<sub>2/3</sub>Ni<sub>1/3</sub>Ti<sub>2/3</sub>O<sub>2</sub> cells with different cut-off voltage.

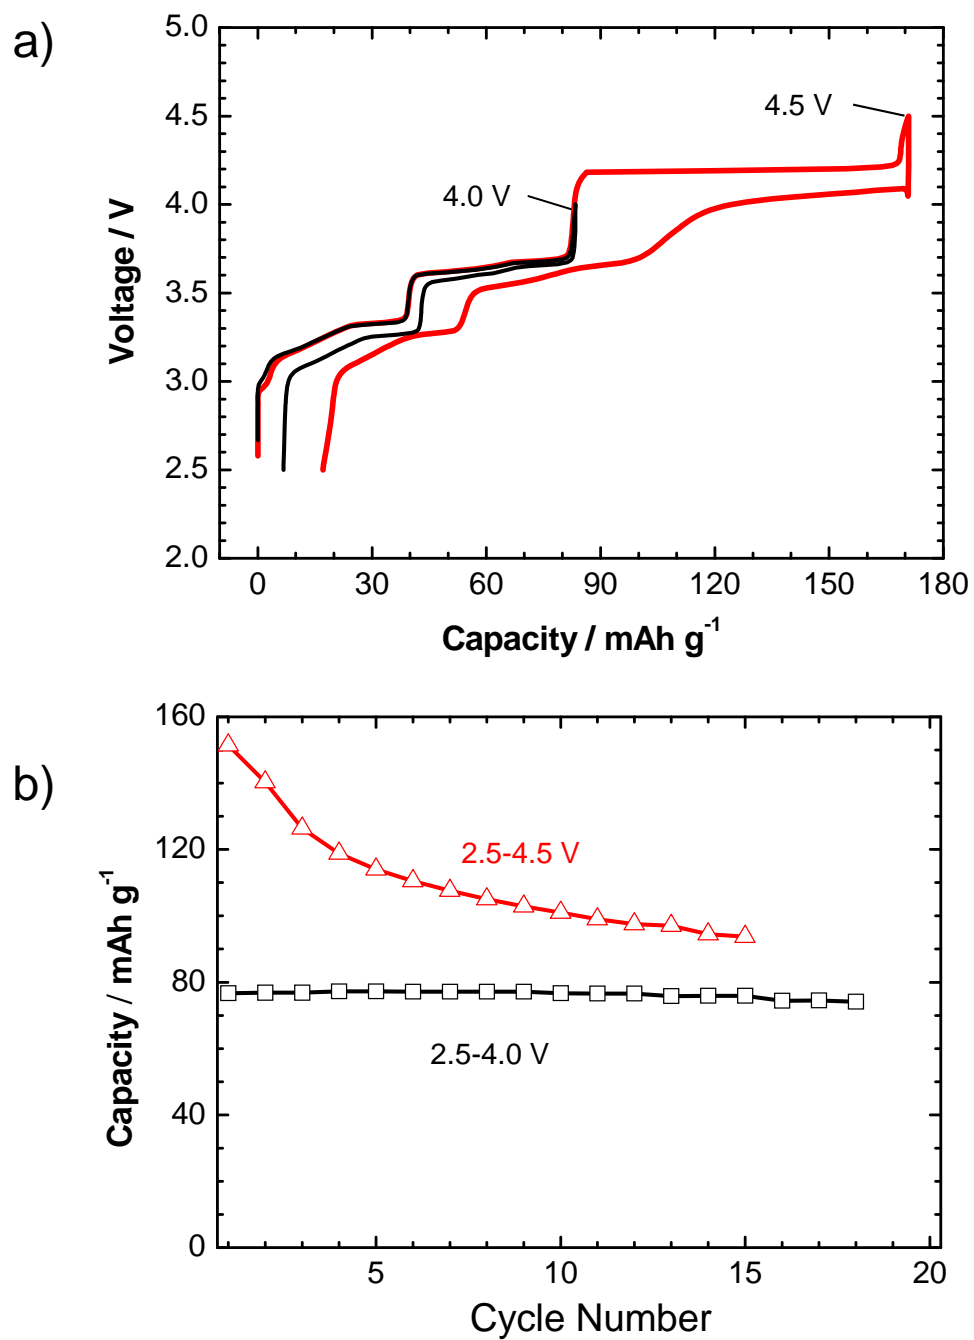

Figure S2. (a) Charge/discharge curves and (b) discharge capacity retention of Na//Na<sub>2/3</sub>Ni<sub>1/3</sub>Mn<sub>2/3</sub>O<sub>2</sub> cells with different cut-off voltage.

Table S1. Comparison of the electrochemical properties and the ratio of lattice volume changes of samples.

|                                                                                        | Energy Density <sup>a</sup><br>/Wh kg <sup>-1</sup> | Capacity retention <sup>b</sup><br>/% | d-space(fully charged) <sup>c</sup><br>/Å | Cell volume change <sup>d</sup><br>/% |
|----------------------------------------------------------------------------------------|-----------------------------------------------------|---------------------------------------|-------------------------------------------|---------------------------------------|
| Na <sub>2/3</sub> Ni <sub>1/3</sub> Mn <sub>2/3</sub> O <sub>2</sub>                   | 556                                                 | 66.7                                  | 4.43                                      | -23.2                                 |
| Na <sub>2/3</sub> Ni <sub>1/3</sub> Mn <sub>1/2</sub> Ti <sub>1/6</sub> O <sub>2</sub> | 470                                                 | 93.9                                  | 5.03                                      | -12.7                                 |
| Na <sub>2/3</sub> Ni <sub>1/3</sub> Mn <sub>1/3</sub> Ti <sub>1/3</sub> O <sub>2</sub> | 437                                                 | 86.7                                  | 5.10                                      | -12.1                                 |

<sup>a</sup> Calculated from Figure 2.

<sup>b</sup> Capacity retention after 10 cycle.

<sup>c</sup> Inter-layer distance after fully charging (to 4.5 V) was calculated from ex-situ XRD results.

<sup>d</sup> Cell volume change is estimated by difference of lattice volume of fully-charged and pristine.
